# Supplementary material
Source: MDPI journal article supplement (https://www.mdpi.com/1999-4907/9/8/482)

## Supplementary files

**Table S1.** Analysis of variance of allelopathic activity by sandwich method. Differences at probability for F-distribution ( $p < 0.05$ ) are considered as significant different ( $\alpha = 0.05$ ).

|                      |               | Sum of Squares | df.   | Mean Square | F     | Sig.  |
|----------------------|---------------|----------------|-------|-------------|-------|-------|
| <b>hypocotyl</b>     |               |                |       |             |       |       |
| <b>July 2014</b>     | Among groups  | 0.002          | 1     | 0.002       | 0.173 | 0.682 |
|                      | Within groups | 0.251          | 18    | 0.014       |       |       |
|                      | Total         | 0.254          | 19    |             |       |       |
| <b>October 2014</b>  | Among groups  | 0.007          | 1     | 0.007       | 0.189 | 0.669 |
|                      | Within groups | 0.687          | 18    | 0.038       |       |       |
|                      | Total         | 0.694          | 19    |             |       |       |
| <b>November 2014</b> | Among groups  | 0.000          | 1     | 0.000       | 0.035 | 0.853 |
|                      | Within groups | 0.164          | 18    | 0.009       |       |       |
|                      | Total         | 0.164          | 19    |             |       |       |
| <b>May 2015</b>      | Among groups  | 0.013          | 1     | 0.013       | 0.269 | 0.610 |
|                      | Within groups | 0.836          | 18    | 0.046       |       |       |
|                      | Total         |                | 0.848 | 19          |       |       |
| <b>Radicle</b>       |               |                |       |             |       |       |
| <b>July 2014</b>     | Among groups  | 0.007          | 1     | 0.007       | 1.708 | 0.208 |
|                      | Within groups | 0.076          | 18    | 0.004       |       |       |
|                      | Total         | 0.083          | 19    |             |       |       |
| <b>October 2014</b>  | Among groups  | 0.003          | 1     | 0.003       | 0.144 | 0.709 |
|                      | Within groups | 0.422          | 18    | 0.023       |       |       |
|                      | Total         | 0.426          | 19    |             |       |       |
| <b>November 2014</b> | Among groups  | 0.032          | 1     | 0.032       | 1.277 | 0.273 |
|                      | Within groups | 0.451          | 18    | 0.025       |       |       |
|                      | Total         | 0.483          | 19    |             |       |       |
| <b>May 2015</b>      | Among groups  | 0.002          | 1     | 0.002       | 0.154 | 0.699 |
|                      | Within groups | 0.234          | 18    | 0.013       |       |       |
|                      | Total         | 0.236          | 19    |             |       |       |

**Table S2.** Analysis of variance of allelopathic activity by soil-mixed method. Differences at probability for F-distribution ( $p < 0.05$ ) are considered as significant different ( $\alpha = 0.05$ ).

|                      |               | Sum of Squares | df | Mean Square | F     | Sig   |
|----------------------|---------------|----------------|----|-------------|-------|-------|
| <b>hypocotyl</b>     |               |                |    |             |       |       |
| <b>July 2014</b>     | Among groups  | 0.002          | 1  | 0.002       | 0.157 | 0.696 |
|                      | Within groups | 0.277          | 18 | 0.015       |       |       |
|                      | Total         | 0.279          | 19 |             |       |       |
| <b>October 2014</b>  | Among groups  | 0.009          | 1  | 0.009       | 0.305 | 0.588 |
|                      | Within groups | 0.521          | 18 | 0.029       |       |       |
|                      | Total         | 0.529          | 19 |             |       |       |
| <b>November 2014</b> | Among groups  | 0.010          | 1  | 0.010       | 0.456 | 0.508 |
|                      | Within groups | 0.382          | 18 | 0.021       |       |       |
|                      | Total         | 0.392          | 19 |             |       |       |
| <b>May 2015</b>      | Among groups  | 0.104          | 1  | 0.104       | 2.134 | 0.161 |
|                      | Within groups | 0.875          | 18 | 0.049       |       |       |
|                      | Total         | 0.978          | 19 |             |       |       |
| <b>Radicle</b>       |               |                |    |             |       |       |
| <b>July 2014</b>     | Among groups  | 0.003          | 1  | 0.003       | 0.201 | 0.660 |
|                      | Within groups | 0.303          | 18 | 0.017       |       |       |
|                      | Total         | 0.307          | 19 |             |       |       |
| <b>October 2014</b>  | Among groups  | 0.032          | 1  | 0.032       | 1.268 | 0.275 |
|                      | Within groups | 0.454          | 18 | 0.025       |       |       |
|                      | Total         | 0.486          | 19 |             |       |       |
| <b>November 2014</b> | Among groups  | 0.032          | 1  | 0.032       | 1.984 | 0.176 |
|                      | Within groups | 0.295          | 18 | 0.016       |       |       |
|                      | Total         | 0.327          | 19 |             |       |       |
| <b>May 2015</b>      | Among groups  | 0.001          | 1  | 0.001       | 0.123 | 0.730 |
|                      | Within groups | 0.187          | 18 | 0.010       |       |       |
|                      | Total         | 0.188          | 19 |             |       |       |

**Table S3.** Analysis of variance of cultureable soil microorganism numbers. Differences at probability for F-distribution ( $p < 0.05$ ) are considered as significant different ( $\alpha = 0.05$ ).

|               |               | Sum of Squares | df | Mean Square | F     | Sig   |
|---------------|---------------|----------------|----|-------------|-------|-------|
| Bacteria      |               |                |    |             |       |       |
| July 2014     | Among groups  | 0.386          | 1  | 0.386       | 3.766 | 0.068 |
|               | Within groups | 1.847          | 18 | 0.103       |       |       |
|               | Total         | 2.233          | 19 |             |       |       |
| October 2014  | Among groups  | 0.17           | 1  | 0.170       | 0.342 | 0.566 |
|               | Within groups | 0.914          | 18 | 0.051       |       |       |
|               | Total         | 0.931          | 19 |             |       |       |
| January 2015  | Among groups  | 0.081          | 1  | 0.081       | 2.070 | 0.167 |
|               | Within groups | 0.708          | 18 | 0.039       |       |       |
|               | Total         | 0.789          | 19 |             |       |       |
| May 2015      | Among groups  | 0.004          | 1  | 0.004       | 0.134 | 0.718 |
|               | Within groups | 0.547          | 18 | 0.030       |       |       |
|               | Total         | 0.551          | 19 |             |       |       |
| Fungus        |               |                |    |             |       |       |
| July 2014     | Among groups  | 0.023          | 1  | 0.023       | 0.392 | 0.059 |
|               | Within groups | 0.542          | 18 | 0.030       |       |       |
|               | Total         | 0.565          | 19 |             |       |       |
| October 2014  | Among groups  | 0.063          | 1  | 0.063       | 0.056 | 0.142 |
|               | Within groups | 0.272          | 18 | 0.015       |       |       |
|               | Total         | 0.334          | 19 |             |       |       |
| January 2015  | Among groups  | 0.157          | 1  | 0.157       | 0.058 | 0.188 |
|               | Within groups | 0.687          | 18 | 0.038       |       |       |
|               | Total         | 0.844          | 19 |             |       |       |
| May 2015      | Among groups  | 0.221          | 1  | 0.221       | 0.081 | 0.964 |
|               | Within groups | 1.162          | 18 | 0.065       |       |       |
|               | Total         | 1.383          | 19 |             |       |       |
| Actinomycetes |               |                |    |             |       |       |
| July 2014     | Among groups  | 0.111          | 1  | 0.111       | 3.400 | 0.082 |
|               | Within groups | 0.587          | 18 | 0.033       |       |       |
|               | Total         | 0.698          | 19 |             |       |       |
| October 2014  | Among groups  | 0.012          | 1  | 0.012       | 0.515 | 0.482 |
|               | Within groups | 0.412          | 18 | 0.023       |       |       |
|               | Total         | 0.424          | 19 |             |       |       |
| January 2015  | Among groups  | 0.107          | 1  | 0.107       | 3.748 | 0.069 |
|               | Within groups | 0.512          | 18 | 0.028       |       |       |
|               | Total         | 0.619          | 19 |             |       |       |
| May 2015      | Among groups  | 0.000          | 1  | 0.000       | 0.005 | 0.945 |
|               | Within groups | 0.576          | 18 | 0.032       |       |       |
|               | Total         | 0.576          | 19 |             |       |       |

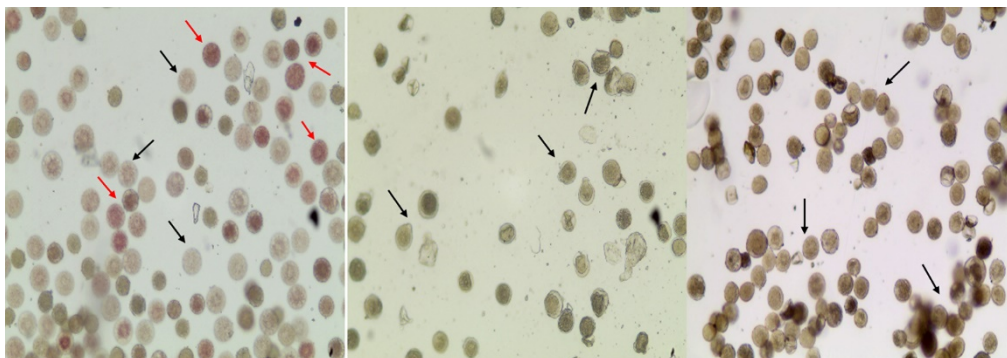

**Figure S1.** Pollen viability tested by triphenyl tetrazolium chloride (TTC) at the day of anther opening. Stained pollen were observed only in TB16 (left); no pollen were stained in transgenic poplar T-46 (middle) or non-transgenic poplar 401 (right); the red arrows are stained pollen grains; the black arrows are unstained pollen grains.

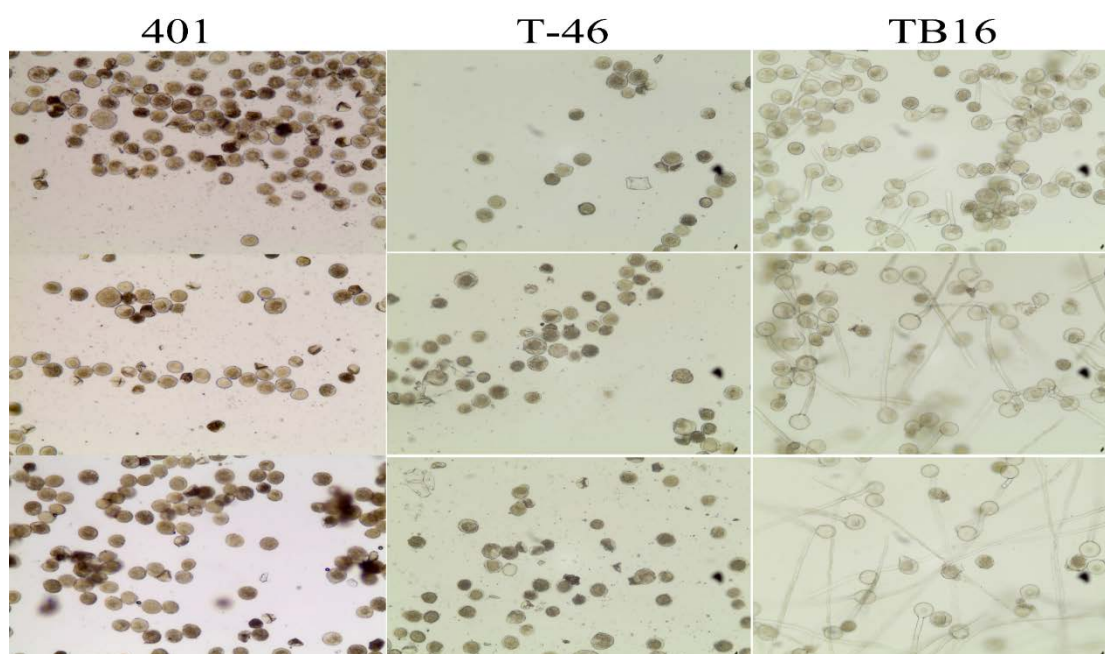

**Figure S2.** Pollen viability tested by the *in vitro* pollen germination test at the day of anther opening. First line: *in vitro* pollen germination test after 0.5 h; second line: *in vitro* pollen germination test after 1 h; third line: *in vitro* pollen germination test after 6 h. Germinated pollen were observed only in TB16 after 0.5 h (first line); no pollen were germinated even after 6 h in transgenic poplar T-46 or non-transgenic poplar 401 (third line).

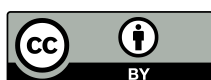

Supplement: s1 [file s1]
